# Supplementary material
Source: PubMed Central journal article supplement (PMC4944092)
Supplement: NIHMS798824-supplement-01.pdf [file NIHMS798824-supplement-01.pdf]

**eTable 1. Survey questions on surgeon and hospital selection**

| Assessment                             | Question/Answers provided                                                                                                                                                                                                                                                                                                                                                                                                                                                                                                                                                                                                                                                                                                                                                                                                                          |
|----------------------------------------|----------------------------------------------------------------------------------------------------------------------------------------------------------------------------------------------------------------------------------------------------------------------------------------------------------------------------------------------------------------------------------------------------------------------------------------------------------------------------------------------------------------------------------------------------------------------------------------------------------------------------------------------------------------------------------------------------------------------------------------------------------------------------------------------------------------------------------------------------|
| Selection of surgeon <sup>23</sup>     | <p><i>Which of the following statements describe how the surgeon who performed your breast surgery was selected? (select all that apply)</i></p> <p><input type="checkbox"/> The surgeon was one of the only surgeons available through my health care plan</p> <p><input type="checkbox"/> I was referred to the surgeon by another doctor</p> <p><input type="checkbox"/> I chose this surgeon because of his/her reputation</p> <p><input type="checkbox"/> This surgeon was recommended to me by a relative or friend</p> <p><input type="checkbox"/> I chose this surgeon because I wanted to be treated at the medical institution where he/she worked</p> <p><input type="checkbox"/> I wanted a surgeon who practiced near my home</p> <p><input type="checkbox"/> I chose this surgeon because of some other reason _____<sup>a</sup></p> |
| Selection of Hospital <sup>21,22</sup> | <p><i>Which of the following statements describe how the hospital where you had breast cancer surgery was selected? (select all that apply)</i></p> <p><input type="checkbox"/> I was referred to the hospital by my doctor</p> <p><input type="checkbox"/> I chose this hospital because of its reputation</p> <p><input type="checkbox"/> This hospital was recommended to me by a relative or friend</p> <p><input type="checkbox"/> I chose this hospital because I wanted to be treated at the medical institution where my doctor worked</p> <p><input type="checkbox"/> I wanted a hospital near my home</p> <p><input type="checkbox"/> Other _____<sup>b</sup></p>                                                                                                                                                                        |

<sup>a</sup> Additional category was created for 'received prior treatment from this physician' because this was the most frequent answer provided for 'other'

<sup>b</sup> Additional categories were created for 'hospital was a part of my health plan' and 'past treatment at this hospital' because these were the most frequent answers provided for 'other'
